# Supplementary material for: Defining the Environmental Adaptations of Genus Devosia: Insights into its Expansive Short Peptide Transport System and Positively Selected Genes
Source: PubMed Central journal article supplement (PMC6981132; doi:10.1038/s41598-020-58163-8), 2020-01-24
Supplement: 41598_2020_58163_MOESM1_ESM.pdf [file 41598_2020_58163_MOESM1_ESM.pdf]

## Supplementary Information

### Defining the Environmental Adaptations of Genus *Devosia*: Insights into its Expansive Short Peptide Transport System and Positively Selected Genes

**Chandni Talwar<sup>a†</sup>, Shekhar Nagar<sup>a†</sup>, Roshan Kumar<sup>b</sup>, Joy Scaria<sup>c,d</sup>, Rup Lal<sup>e</sup> and Ram Krishan Negi<sup>a\*</sup>.**

<sup>a</sup>Department of Zoology, University of Delhi, Delhi-110007, India.

<sup>b</sup>P.G. Department of Zoology, Magadh University, Bodh-Gaya-824234, Bihar, India

<sup>c</sup>Department of Veterinary and Biomedical Sciences, South Dakota State University, Brookings, SD, USA.

<sup>d</sup>South Dakota Center for Biologics Research and Commercialization, SD, USA.

<sup>e</sup>NASI Senior Scientist Platinum Jubilee Fellow, The Energy and Resources Institute, Darbari Seth Block, IHC Complex, Lodhi Road, New Delhi-110003, India

† Authors contributed equally

Email: [negigurukul@gmail.com](mailto:negigurukul@gmail.com)

**Figure S1**

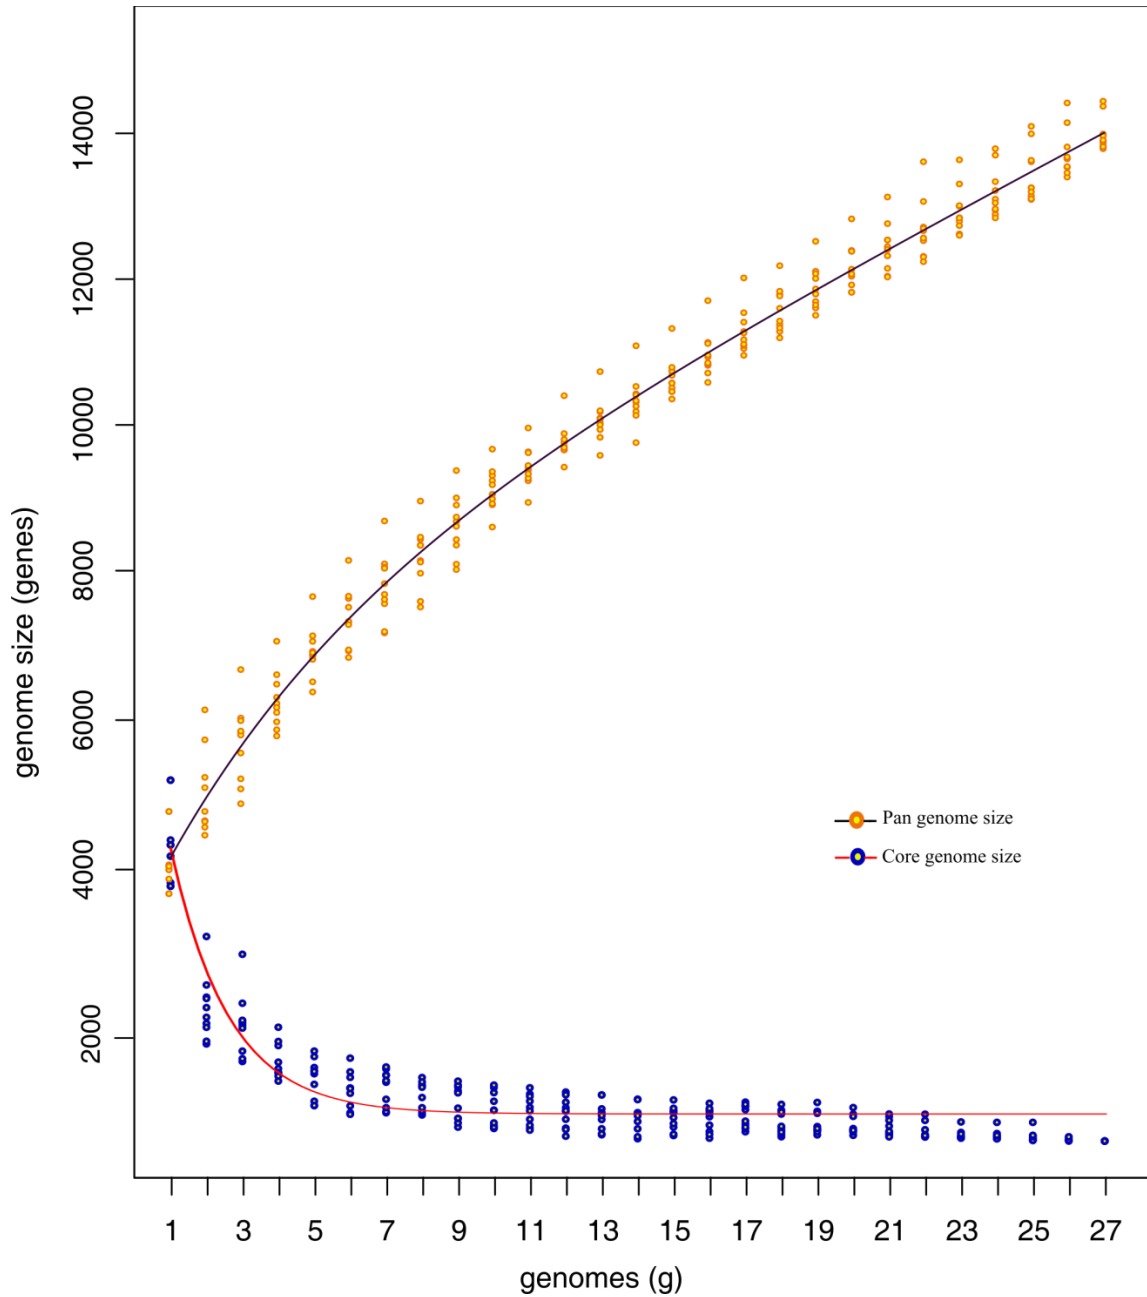

**Supplementary Figure S1. Pan and core genome sizes.** The numbers of pan and core genes are plotted as a function of the number of genomes (g) added sequentially. *y-axis* shows the change in core genome and pan genome sizes as a function of random addition of genomes plotted on *x-axis*. The sizes of core and pan genomes were computed using OMCL algorithm. The best fit regression represents the Tettelin curve for both core and pan genomes.

**Figure S2**

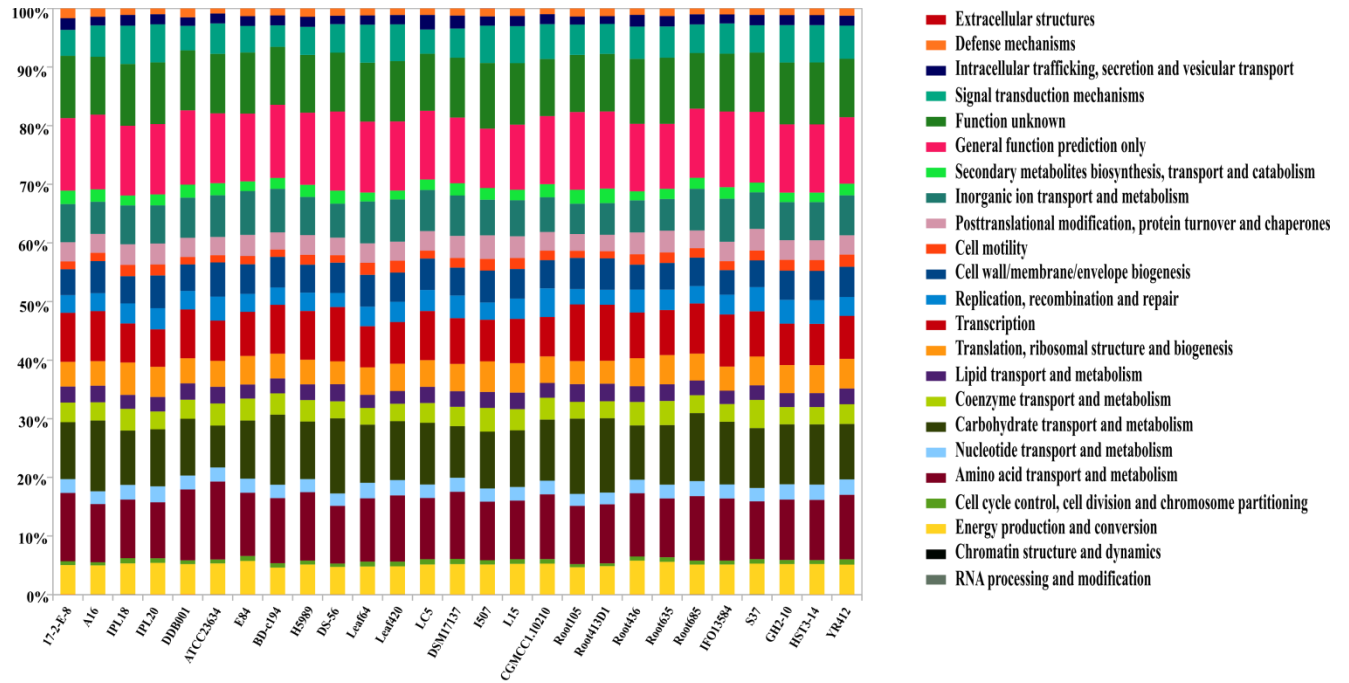

**Supplementary Figure S2.** Predicted oligo-peptide and di-peptide permeases in the analyzed strains.

**Figure S3**

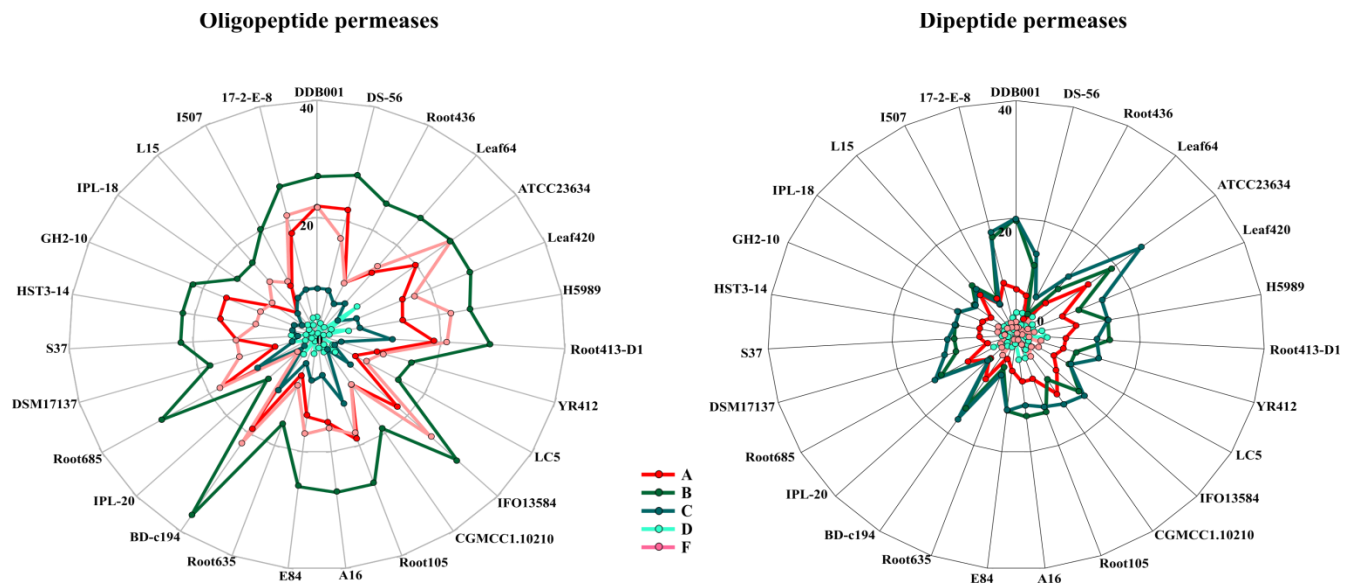

**Supplementary Figure S3.** Phylogeny of the predicted substrate binding components of (A) oligopeptide permeases (OppA) and (B) di-peptide permease (DppA) proteins predicted in the genomes of *Devosia* (blue) and representative genomes of other genera of family *Hyphomicrobiaceae* (red) constructed using Neighbour-joining method at 100 bootstrap replications. The bootstrap confidence levels are shown with circles on the branches.

**Supplementary Table S1.** List of genomes of the family *Hyphomicrobiceae* with the predicted copy number of genes associated with oligo-peptide and di-peptide transporters included in the study for comparison with *Devosia*.

| Genome                                                                                     | OppA | OppB | OppC | OppD | OppF | DppA | DppB | DppC | DppD | DppF |
|--------------------------------------------------------------------------------------------|------|------|------|------|------|------|------|------|------|------|
| <i>Aquabacter</i> sp. Sn-9-2<br>( <a href="#">NZ_RWKV00000000.1</a> )                      | 2    | 3    | 2    | 2    | 2    | 3    | 2    | 2    | 0    | 0    |
| <i>Aquabacter spiritensis</i> DSM 9035<br>( <a href="#">NZ_SMAI00000000.1</a> )            | 2    | 3    | 1    | 2    | 2    | 2    | 2    | 2    | 0    | 0    |
| <i>Arsenicitalea aurantiaca</i> 42-50<br>( <a href="#">NZ_RZSJ00000000.1</a> )             | 8    | 14   | 3    | 3    | 9    | 6    | 10   | 13   | 2    | 1    |
| <i>Blastochloris</i> sp. GI<br>( <a href="#">NZ_AP018907.1</a> )                           | 1    | 2    | 1    | 0    | 0    | 0    | 0    | 0    | 0    | 0    |
| <i>Blastochloris viridis</i> ATCC 19567<br>( <a href="#">NZ_CP012946.1</a> )               | 1    | 2    | 1    | 0    | 0    | 0    | 0    | 0    | 1    | 0    |
| <i>Cucumibacter marinus</i> DSM 18995<br>( <a href="#">NZ_AUCR00000000.1</a> )             | 6    | 12   | 4    | 2    | 11   | 5    | 8    | 7    | 2    | 1    |
| <i>Dichotomicrobium thermohalophilum</i> DSM 5002<br>( <a href="#">NZ_QXDF00000000.1</a> ) | 1    | 2    | 1    | 0    | 0    | 0    | 0    | 0    | 0    | 0    |
| <i>Filomicrobium insigne</i> CGMCC1.6497<br>( <a href="#">NZ_FNJC00000000.1</a> )          | 1    | 2    | 1    | 0    | 0    | 0    | 0    | 0    | 0    | 0    |
| <i>Filomicrobium</i> sp. MED665<br>( <a href="#">NZ_GY00000000.1</a> )                     | 4    | 6    | 1    | 0    | 5    | 2    | 1    | 6    | 0    | 0    |
| <i>Hyphomicrobium denitrificans</i> ATCC 51888<br>( <a href="#">NC_014313.1</a> )          | 1    | 2    | 1    | 0    | 0    | 0    | 0    | 0    | 0    | 0    |
| <i>Hyphomicrobium facile</i> DSM 1565<br>( <a href="#">NZ_FPCH00000000.1</a> )             | 1    | 2    | 1    | 0    | 0    | 0    | 0    | 0    | 0    | 0    |
| <i>Hyphomicrobium</i> sp. MC1<br>( <a href="#">NC_015717.1</a> )                           | 1    | 2    | 1    | 0    | 0    | 2    | 0    | 0    | 0    | 0    |
| <i>Hyphomicrobium sulfonivorans</i> WDL6<br>( <a href="#">NZ_LMTR00000000.1</a> )          | 1    | 4    | 1    | 0    | 0    | 1    | 0    | 1    | 0    | 0    |
| <i>Hyphomicrobium zavarzinii</i> ZV622<br>( <a href="#">NZ_ARTG00000000.1</a> )            | 1    | 2    | 1    | 0    | 0    | 0    | 0    | 0    | 0    | 0    |
| <i>Maritalea mobilis</i> CGMCC 1.7002<br>( <a href="#">NZ_SNYR00000000.1</a> )             | 6    | 10   | 4    | 5    | 9    | 8    | 10   | 9    | 1    | 3    |
| <i>Maritalea myrionectae</i> DSM 19524<br>( <a href="#">AUHV01</a> )                       | 3    | 7    | 3    | 3    | 5    | 8    | 6    | 7    | 1    | 3    |
| <i>Pelagibacterium halotolerans</i> B2<br>( <a href="#">NC_016078.1</a> )                  | 5    | 17   | 3    | 0    | 12   | 9    | 9    | 10   | 1    | 0    |

|                                                                                        |   |    |   |   |    |    |    |    |   |   |
|----------------------------------------------------------------------------------------|---|----|---|---|----|----|----|----|---|---|
| <i>Pelagibacterium lentulum</i> B2<br>( <a href="#">NZ_RZMW00000000.1</a> )            | 8 | 15 | 3 | 5 | 12 | 9  | 15 | 12 | 2 | 2 |
| <i>Pelagibacterium luteolum</i> CGMCC 1.10267<br>( <a href="#">NZ_FNCS00000000.1</a> ) | 3 | 11 | 3 | 2 | 8  | 6  | 5  | 6  | 1 | 0 |
| <i>Pelagibacterium montanilacus</i> CCL18<br>( <a href="#">NZ_RZMX00000000.1</a> )     | 1 | 8  | 3 | 5 | 7  | 6  | 3  | 5  | 0 | 0 |
| <i>Prosthecomicrobium hirschii</i> 16<br>( <a href="#">LJYW01</a> )                    | 8 | 12 | 2 | 2 | 16 | 12 | 15 | 18 | 2 | 0 |
| <i>Prosthecomicrobium</i> sp. SZUA402<br>( <a href="#">QKBQ00000000.1</a> )            | 1 | 1  | 1 | 1 | 0  | 4  | 2  | 1  | 0 | 1 |
| <i>Rhodomicrobium udaipurense</i> JA643<br>( <a href="#">NZ_JFZJ00000000.1</a> )       | 1 | 2  | 1 | 0 | 0  | 0  | 0  | 0  | 0 | 0 |
| <i>Rhodomicrobium vannielii</i> ATCC 17100<br>( <a href="#">NC_014664.1</a> )          | 1 | 2  | 1 | 0 | 0  | 0  | 0  | 0  | 0 | 0 |
| <i>Rhodoplanes elegans</i> DSM 11907<br>( <a href="#">NZ_NPEU00000000.1</a> )          | 1 | 4  | 1 | 0 | 2  | 4  | 2  | 2  | 0 | 0 |
| <i>Rhodoplanes piscinae</i> DSM 19946<br>( <a href="#">NPEW01</a> )                    | 1 | 2  | 1 | 0 | 0  | 0  | 0  | 0  | 0 | 0 |
| <i>Rhodoplanes roseus</i> DSM 5909<br>( <a href="#">NZ_NPEX00000000.1</a> )            | 1 | 4  | 1 | 0 | 2  | 5  | 2  | 2  | 0 | 0 |
